# Supplementary material for: The Arteria Lymphatica and Lymphatic Microperforators: A Dedicated Blood Supply to Collecting Lymphatics and Their Potential Implications in Lymphedema: Anatomical Description
Source: PubMed Central journal article supplement — Plast Reconstr Surg Glob Open. 2024 Jan 24;12(1):e5547. doi: 10.1097/GOX.0000000000005547 (PMC10807887; doi:10.1097/gox.0000000000005547), 2024-01-24
Supplement: gox-12-e5547-s002.pdf [file gox-12-e5547-s002.pdf]

## **SDC2**

### **Micro CT settings:**

Case 4 (53 minutes; 800 projections;  $av = 3$ ;  $skip = 1$ ;  $timing = 500$  mS); case 6 (66 minutes; 1000 projections;  $av = 3$ ;  $skip = 1$ ;  $timing = 500$  mS); control (57 minutes; 1500 projections;  $av = 2$ ;  $skip = 0$ ;  $timing = 500$  mS); case 5 (2 scans for 79 minutes each; 2000 projections;  $av = 2$ ;  $skip = 0$ ;  $timing = 500$  mS). Volume reconstruction was performed using Phoenix datos|x reconstruction software (GE Sensing & Inspection Technologies). The two separate volume files for case 5 were merged using Avizo (FEI).
