# Supplementary material for: The Arteria Lymphatica and Lymphatic Microperforators: A Dedicated Blood Supply to Collecting Lymphatics and Their Potential Implications in Lymphedema: Anatomical Description
Source: PubMed Central journal article supplement — Plast Reconstr Surg Glob Open. 2024 Jan 24;12(1):e5547. doi: 10.1097/GOX.0000000000005547 (PMC10807887; doi:10.1097/gox.0000000000005547), 2024-01-24
Supplement: gox-12-e5547-s003.pdf [file gox-12-e5547-s003.pdf]

### SDC 3: Patient demographics and biospecimens

| Case | M/<br>F | Age | Lymphedema<br>Duration | Stage | Etiology                                                                                       | Limb      | Analysis                   |
|------|---------|-----|------------------------|-------|------------------------------------------------------------------------------------------------|-----------|----------------------------|
| 1    | M       | 66  | 4 years (2013)         | II    | Inguinal<br>lymphadenectomy<br>(Bowel CA) 2006<br>Radiotherapy<br>2012.<br>Multiple infections | Lower (R) | Imaging, histology<br>IHC  |
| 2    | F       | 49  | 7 years (2010)         | II    | Axillary<br>lymphadenectomy<br>& Radiotherapy<br>(Breast CA).<br>Multiple infections<br>(>20)  | Upper (L) | Imaging, histology<br>IHC  |
| 3    | F       | 41  | 6 years (2011)         | II    | Minor Trauma leg                                                                               | Lower (L) | Imaging, histology<br>IHC  |
| 4    | F       | 50  | 5 years (2012)         | II    | Inguinal<br>lymphadenectomy<br>(Ovarian CA).<br>Multiple infections                            | Upper (R) | Imaging, micro CT<br>& TEM |
| 5    | F       | 58  | 5 years (2012)         | II    | Lipoma excision,<br>complicated by<br>seroma                                                   | Lower (L) | Imaging, micro CT<br>& TEM |
| 6    | F       | 43  | 1 year (2016)          | II    | Axillary<br>lymphadenectomy<br>& Radiotherapy<br>(Breast CA).                                  | Upper (L) | Imaging, micro CT<br>& TEM |

|                |                 |            |                                |              |                                                 |             |                                       |
|----------------|-----------------|------------|--------------------------------|--------------|-------------------------------------------------|-------------|---------------------------------------|
| 7              | F               | 75         | 1 year (2016)                  | II           | Axillary lymphadenectomy                        | Upper (L)   | Imaging, histology & IHC              |
| 8              | M               | 32         | 2 years (2015)                 | II           | Minor leg trauma                                | Lower (L)   | Imaging, histology IHC                |
| 9              | F               | 75         | 4 years (2012)                 | II           | Minor trauma leg                                | Lower (L)   | Imaging, histology IHC                |
| 10             | F               | 26         | 1 year (2016)                  | II           | Road trauma                                     | Lower (R)   | Imaging, histology IHC                |
| <b>Control</b> | <b>M/<br/>F</b> | <b>Age</b> | <b>Lymphedema<br/>Duration</b> | <b>Stage</b> | <b>Control Surgery</b>                          | <b>Limb</b> | <b>Lymphatic analysis</b>             |
| 1              | F               | 54         | N/A                            | N/A          | Mastectomy (Breast CA – no nodal surgery, 2014) | Lower (L)   | Imaging histology, IHC Micro CT & TEM |
| 2              | M               | 67         | N/A                            | N/A          | Sentinel node biopsy                            | Lower (L)   | Imaging & histology                   |
| 3              | F               | 74         | N/A                            | N/A          | Sentinel node biopsy                            | Lower (L)   | Imaging & histology                   |
| 4              | F               | 52         | N/A                            | N/A          | Breast reconstruction                           | Lower (R)   | Imaging & histology                   |
| 5              | F               | 68         | N/A                            | N/A          | Breast reconstruction                           | Lower (R)   | Imaging & histology                   |
| 6              | F               | 28         | N/A                            | N/A          | Tissue reduction                                | Lower (R)   | Imaging & histology                   |
