# Supplementary material for: The Arteria Lymphatica and Lymphatic Microperforators: A Dedicated Blood Supply to Collecting Lymphatics and Their Potential Implications in Lymphedema: Anatomical Description
Source: PubMed Central journal article supplement — Plast Reconstr Surg Glob Open. 2024 Jan 24;12(1):e5547. doi: 10.1097/GOX.0000000000005547 (PMC10807887; doi:10.1097/gox.0000000000005547), 2024-01-24
Supplement: gox-12-e5547-s004.pdf [file gox-12-e5547-s004.pdf]

#### SDC 4

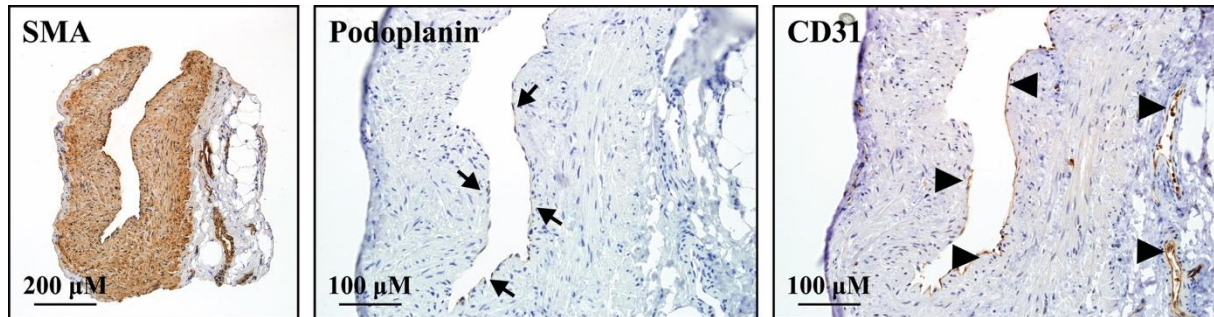

**Light microscopy images of transverse serial sections through the lymphatic wall (SDC3; Case 1).**

Smooth muscle actin staining showing thickness of the smooth muscle media (x10 magnification) (*left*). D2-40 (podoplanin) staining showing lymphatic endothelium (20x magnification, arrows) (*middle*). CD31 immunostaining showing weak expression only lymphatic endothelium (20x magnification; closed arrows) but strongly stained CD31 structures in blood vasculature associated with the lymphatic wall (*right*).
