# Supplementary material for: The Arteria Lymphatica and Lymphatic Microperforators: A Dedicated Blood Supply to Collecting Lymphatics and Their Potential Implications in Lymphedema: Anatomical Description
Source: PubMed Central journal article supplement — Plast Reconstr Surg Glob Open. 2024 Jan 24;12(1):e5547. doi: 10.1097/GOX.0000000000005547 (PMC10807887; doi:10.1097/gox.0000000000005547), 2024-01-24
Supplement: gox-12-e5547-s005.pdf [file gox-12-e5547-s005.pdf]

## SDC 5

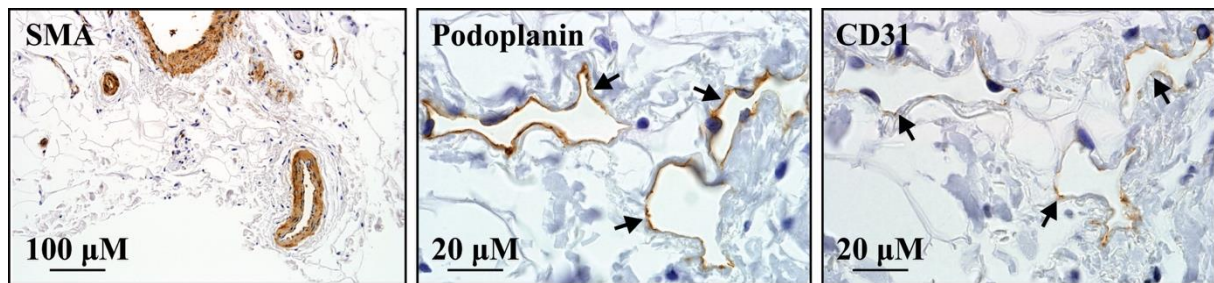

**Light microscopy images of transverse serial sections through a perforating vascular bundle from the groin of a female without lymphedema.**

Smooth muscle actin positive (brown) staining of the smooth muscle media of arteries and veins. Lymphatic structures were not detected by smooth muscle actin immunostaining (*left*). D2-40 staining (100x magnification; arrows and label) indicating expression of the lymphatic-specific marker podoplanin by lymphatic vessels (*middle*). CD31 immunostaining of the serial section demonstrating weak staining of the thin-walled lymphatics, including the lymphatic micro perforators that connect the collecting lymphatics to the more superficial dermal lymphatic vessels (arrows and label) (*right*).
